# Supplementary material for: Aqueous processing of paper separators by filtration dewatering: towards Li-ion paper batteries
Source: Royal Society of Chemistry journal article supplement (doi:10.1039/c5ta03716f), 2015-01-01
Supplement: c5ta03716f1.pdf [file c5ta03716f1.pdf]

## Supporting Information

Aqueous processing of paper separators by filtration dewatering: towards Li-ion paper batteries

Lorenzo Zolin,<sup>a,b,d,\*</sup> Matteo Destro,<sup>d</sup> Didier Chaussy,<sup>a,b,c</sup> Nerino Penazzi,<sup>d</sup> Claudio Gerbaldi,<sup>d</sup>  
Davide Beneventi,<sup>a,b,c</sup>

<sup>a</sup> Univ. Grenoble Alpes, LGP2, F-38000 Grenoble, France

<sup>b</sup> CNRS, LGP2, F-38000 Grenoble, France

<sup>c</sup> Agefpi, LGP2, F-38000 Grenoble, France

<sup>d</sup> Politecnico di Torino, Department of Applied Science and Technology - DISAT, CHENERGY Group, GAMELab, Corso Duca degli Abruzzi 24, 10129 Torino, Italy.

The electrochemical response of the paper handsheet stacking separators was tested in Li-ion paper cells in terms of constant current charge/discharge cycling at different temperatures, specifically 0, 10 and 60 °C.

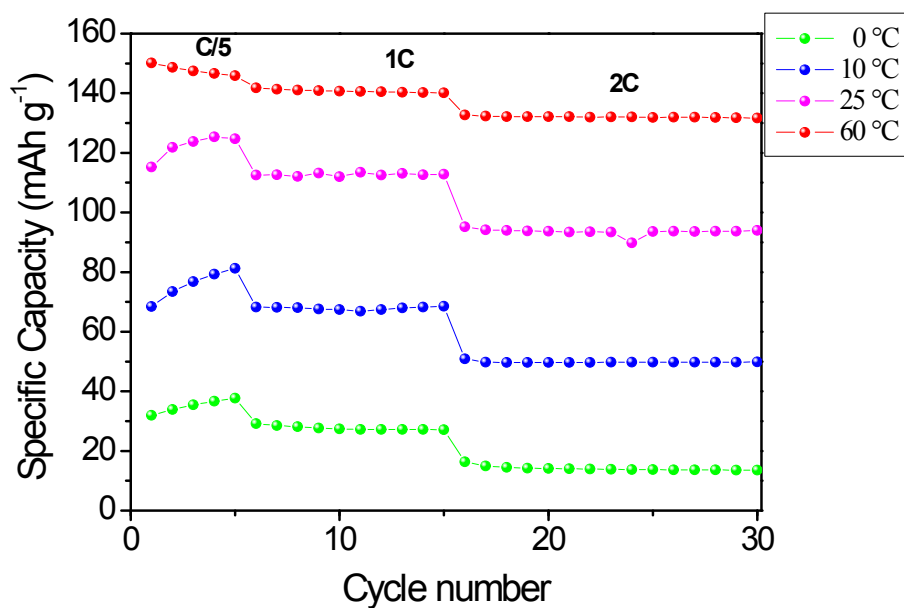

**Figure S1.** Constant-current specific capacity vs. cycle number cycling behaviour of the lab-scale all-paper Li-ion “pouch” cells at different temperatures and current regimes.
